# Supplementary material for: Use of Proton Pump Inhibitors and the Risk for the Development of Gastric Cancers: A Nationwide Population-Based Cohort Study Using Balanced Operational Definitions
Source: MDPI journal article supplement (doi:10.3390/cancers14205172), 2022-10-21
Supplement: s1 [file s1]

# Use of Proton Pump Inhibitors and the Risk for the Development of Gastric Cancers: A Nationwide Population-Based Cohort Study Using Balanced Operational Definitions

**Table S1.** Characteristics of the study subjects who took medication for more than 60 days.

| Variables               | H <sub>2</sub> RA<br>(n = 5,006 ) | PPI<br>(n = 5,006 ) | P value |
|-------------------------|-----------------------------------|---------------------|---------|
| <b>Sex</b>              |                                   |                     | >0.99   |
| Male                    | 3344 (66.8%)                      | 3344 (66.8%)        |         |
| Female                  | 1662 (33.2%)                      | 1662 (33.2%)        |         |
| <b>Ages (years)</b>     |                                   |                     | >0.99   |
| <45                     | 1924 (38.4%)                      | 1924 (38.4%)        |         |
| 45-64                   | 2657 (53.1%)                      | 2657 (53.1%)        |         |
| >64                     | 425 (8.5%)                        | 425 (8.5%)          |         |
| <b>Residence</b>        |                                   |                     | >0.99   |
| Seoul                   | 1101 (22.0%)                      | 1101 (22.0%)        |         |
| Second area             | 1364 (27.2%)                      | 1364 (27.2%)        |         |
| Third area              | 2541 (50.8%)                      | 2541 (50.8%)        |         |
| <b>Household income</b> |                                   |                     | >0.99   |
| Low (0-30%)             | 929 (18.6%)                       | 929 (18.6%)         |         |
| Middle (30-70%)         | 1776 (35.5%)                      | 1776 (35.5%)        |         |
| High (70-100%)          | 2301 (46.0%)                      | 2301 (46.0%)        |         |
| <b>CCI</b>              |                                   |                     | >0.99   |
| 0                       | 3296 (65.8%)                      | 3296 (65.8%)        |         |
| 1                       | 911 (18.2%)                       | 911 (18.2%)         |         |
| ≥2                      | 799 (16.0%)                       | 799 (16.0%)         |         |

H<sub>2</sub>RA, histamine-2 receptor antagonist; PPI, proton pump inhibitor; Seoul, the largest metropolitan area; second area, other metropolitan cities; third area, other areas; CCI, Charlson comorbidity index.

**Table S2.** Characteristics of the study subjects who took medication for more than 90 days.

| Variables               | H <sub>2</sub> RA<br>(n = 2,919 ) | PPI<br>(n = 2,919 ) | P value |
|-------------------------|-----------------------------------|---------------------|---------|
| <b>Sex</b>              |                                   |                     | >0.99   |
| Male                    | 1964 (67.3%)                      | 1964 (67.3%)        |         |
| Female                  | 955 (32.7%)                       | 955 (32.7%)         |         |
| <b>Ages (years)</b>     |                                   |                     | >0.99   |
| <45                     | 1002 (34.3%)                      | 1002 (34.3%)        |         |
| 45-64                   | 1645 (56.4%)                      | 1645 (56.4%)        |         |
| >64                     | 272 (9.3%)                        | 272 (9.3%)          |         |
| <b>Residence</b>        |                                   |                     | >0.99   |
| Seoul                   | 659 (22.6%)                       | 659 (22.6%)         |         |
| Second area             | 782 (26.8%)                       | 782 (26.8%)         |         |
| Third area              | 1478 (50.6%)                      | 1478 (50.6%)        |         |
| <b>Household income</b> |                                   |                     | >0.99   |
| Low (0-30%)             | 576 (19.7%)                       | 576 (19.7%)         |         |
| Middle (30-70%)         | 991 (33.9%)                       | 991 (33.9%)         |         |
| High (70-100%)          | 1352 (46.3%)                      | 1352 (46.3%)        |         |
| <b>CCI</b>              |                                   |                     | >0.99   |
| 0                       | 1857 (63.6%)                      | 1857 (63.6%)        |         |
| 1                       | 572 (19.6%)                       | 572 (19.6%)         |         |
| ≥2                      | 490 (16.8%)                       | 490 (16.8%)         |         |

H<sub>2</sub>RA, histamine-2 receptor antagonist; PPI, proton pump inhibitor; Seoul, the largest metropolitan area; second area, other metropolitan cities; third area, other areas; CCI, Charlson comorbidity index.

**Table S3.** Characteristics of the study subjects who took medication for more than 120 days.

| Variables               | H <sub>2</sub> RA<br>(n = 1,883 ) | PPI<br>(n = 1,883 ) | P value |
|-------------------------|-----------------------------------|---------------------|---------|
| <b>Sex</b>              |                                   |                     | >0.99   |
| Male                    | 1288 (68.4%)                      | 1288 (68.4%)        |         |
| Female                  | 595 (31.6%)                       | 595 (31.6%)         |         |
| <b>Ages (years)</b>     |                                   |                     | >0.99   |
| <45                     | 592 (31.4%)                       | 592 (31.4%)         |         |
| 45-64                   | 1097 (58.3%)                      | 1097 (58.3%)        |         |
| >64                     | 194 (10.3%)                       | 194 (10.3%)         |         |
| <b>Residence</b>        |                                   |                     | >0.99   |
| Seoul                   | 415 (22.0%)                       | 415 (22.0%)         |         |
| Second area             | 508 (27.0%)                       | 508 (27.0%)         |         |
| Third area              | 960 (51.0%)                       | 960 (51.0%)         |         |
| <b>Household income</b> |                                   |                     | >0.99   |
| Low (0–30%)             | 386 (20.5%)                       | 386 (20.5%)         |         |
| Middle (30–70%)         | 650 (34.5%)                       | 650 (34.5%)         |         |
| High (70–100%)          | 847 (45.0%)                       | 847 (45.0%)         |         |
| <b>CCI</b>              |                                   |                     | >0.99   |
| 0                       | 1173 (62.3%)                      | 1173 (62.3%)        |         |
| 1                       | 374 (19.9%)                       | 374 (19.9%)         |         |
| ≥2                      | 336 (17.8%)                       | 336 (17.8%)         |         |

H<sub>2</sub>RA, histamine-2 receptor antagonist; PPI, proton pump inhibitor; Seoul, the largest metropolitan area; second area, other metropolitan cities; third area, other areas; CCI, Charlson comorbidity index.

**Table S4.** Characteristics of the study subjects who took medication for more than 180 days.

| Variables               | H <sub>2</sub> RA<br>(n = 1,003) | PPI(n = 1,003) | P value |
|-------------------------|----------------------------------|----------------|---------|
| <b>Sex</b>              |                                  |                | >0.99   |
| Male                    | 689 (68.7%)                      | 689 (68.7%)    |         |
| Female                  | 314 (31.3%)                      | 314 (31.3%)    |         |
| <b>Ages (years)</b>     |                                  |                | >0.99   |
| <45                     | 265 (26.4%)                      | 265 (26.4%)    |         |
| 45-64                   | 622 (62.0%)                      | 622 (62.0%)    |         |
| >64                     | 116 (11.6%)                      | 116 (11.6%)    |         |
| <b>Residence</b>        |                                  |                | >0.99   |
| Seoul                   | 220 (21.9%)                      | 220 (21.9%)    |         |
| Second area             | 264 (26.3%)                      | 264 (26.3%)    |         |
| Third area              | 519 (51.7%)                      | 519 (51.7%)    |         |
| <b>Household income</b> |                                  |                | >0.99   |
| Low (0–30%)             | 212 (21.1%)                      | 212 (21.1%)    |         |
| Middle (30–70%)         | 356 (35.5%)                      | 356 (35.5%)    |         |
| High (70–100%)          | 435 (43.4%)                      | 435 (43.4%)    |         |
| <b>CCI</b>              |                                  |                | >0.99   |
| 0                       | 616 (61.4%)                      | 616 (61.4%)    |         |
| 1                       | 200 (19.9%)                      | 200 (19.9%)    |         |
| ≥2                      | 187 (18.6%)                      | 187 (18.6%)    |         |

H<sub>2</sub>RA, histamine-2 receptor antagonist; PPI, proton pump inhibitor; Seoul, the largest metropolitan area; second area, other metropolitan cities; third area, other areas; CCI, Charlson comorbidity index.

**Table S5.** Description of time to event and censored data.

| For more than 60 days use    | The number of event |
|------------------------------|---------------------|
| Event                        | 51                  |
| H <sub>2</sub> RA            | 23                  |
| PPI                          | 28                  |
| Total censored (No event)    | 9961                |
| H <sub>2</sub> RA            | 4983                |
| PPI                          | 4978                |
| Termination of study         | 9714                |
| H <sub>2</sub> RA            | 4841                |
| PPI                          | 4873                |
| Loss to follow up / Drop-out | 247                 |
| H <sub>2</sub> RA            | 142                 |
| PPI                          | 105                 |
| For more than 90 days use    | The number of event |
| Event                        | 24                  |
| H <sub>2</sub> RA            | 13                  |
| PPI                          | 11                  |
| Total censored (No event)    | 5814                |
| H <sub>2</sub> RA            | 2906                |
| PPI                          | 2908                |
| Termination of study         | 5662                |
| H <sub>2</sub> RA            | 2815                |
| PPI                          | 2847                |
| Loss to follow up / Drop-out | 152                 |
| H <sub>2</sub> RA            | 91                  |
| PPI                          | 61                  |

H<sub>2</sub>RA, histamine-2 receptor antagonist; PPI, proton pump inhibitor.**Table S6.** Description of time to event and censored data.

| For more than 120 days use   | The number of event |
|------------------------------|---------------------|
| Event                        | 18                  |
| H <sub>2</sub> RA            | 11                  |
| PPI                          | 7                   |
| Total censored (No event)    | 3748                |
| H <sub>2</sub> RA            | 1872                |
| PPI                          | 1876                |
| Termination of study         | 3645                |
| H <sub>2</sub> RA            | 1807                |
| PPI                          | 1838                |
| Loss to follow up / Drop-out | 103                 |
| H <sub>2</sub> RA            | 65                  |
| PPI                          | 38                  |
| For more than 180 days use   | The number of event |
| Event                        | 9                   |
| H <sub>2</sub> RA            | 8                   |
| PPI                          | 1                   |
| Total censored (No event)    | 1997                |
| H <sub>2</sub> RA            | 995                 |
| PPI                          | 1002                |
| Termination of study         | 1943                |
| H <sub>2</sub> RA            | 961                 |
| PPI                          | 982                 |
| Loss to follow up / Drop-out | 54                  |
| H <sub>2</sub> RA            | 34                  |
| PPI                          | 20                  |

H<sub>2</sub>RA, histamine-2 receptor antagonist; PPI, proton pump inhibitor.

**Table S7.** Hazard ratios of gastric cancer development by sex among the included subjects.

| Sex                                                                                                                        | Male              |                  | Female            |                   |
|----------------------------------------------------------------------------------------------------------------------------|-------------------|------------------|-------------------|-------------------|
|                                                                                                                            | H <sub>2</sub> RA | PPI              | H <sub>2</sub> RA | PPI               |
| (For more than) 60 days                                                                                                    |                   |                  |                   |                   |
| Unadjusted HR (95% CI)                                                                                                     | 1.00 (ref)        | 1.47 (0.76-2.86) | 1.00 (ref)        | 0.95 (0.34-2.64)  |
| Adjusted HR (95% CI)                                                                                                       | 1.00 (ref)        | 1.46 (0.75-2.84) | 1.00 (ref)        | 1.01 (0.36-2.83)  |
| 90 days                                                                                                                    |                   |                  |                   |                   |
| Unadjusted HR (95% CI)                                                                                                     | 1.00 (ref)        | 0.89 (0.33-2.43) | 1.00 (ref)        | 1.29 (0.31-5.43)  |
| Adjusted HR (95% CI)                                                                                                       | 1.00 (ref)        | 0.90 (0.33-2.47) | 1.00 (ref)        | 1.28 (0.29-5.56)  |
| 120 days                                                                                                                   |                   |                  |                   |                   |
| Unadjusted HR (95% CI)                                                                                                     | 1.00 (ref)        | 0.83 (0.26-2.66) | 1.00 (ref)        | 0.80 (0.14-4.71)  |
| Adjusted HR (95% CI)                                                                                                       | 1.00 (ref)        | 0.84 (0.26-2.66) | 1.00 (ref)        | 0.85 (0.14-5.25)  |
| 180 days                                                                                                                   |                   |                  |                   |                   |
| Unadjusted HR (95% CI)                                                                                                     | 1.00 (ref)        | 0.00 (0-Inf)     | 1.00 (ref)        | 0.72 (0.06-8.49)  |
| Adjusted HR (95% CI)                                                                                                       | 1.00 (ref)        | 0.00 (0-Inf)     | 1.00 (ref)        | 0.96 (0.06-15.44) |
| H <sub>2</sub> RA, histamine-2 receptor antagonist; PPI, proton pump inhibitor; HR, hazard ratio; CI, confidence interval. |                   |                  |                   |                   |

**Table S8.** Hazard ratios of gastric cancer development by age among the included subjects.

| Ages                                                                                                                              | <45        |                   | 45-64      |                  | >64        |                  |
|-----------------------------------------------------------------------------------------------------------------------------------|------------|-------------------|------------|------------------|------------|------------------|
|                                                                                                                                   | H2RA       | PPI               | H2RA       | PPI              | H2RA       | PPI              |
| (For more than) 60 days                                                                                                           |            |                   |            |                  |            |                  |
| Unadjusted HR (95% CI)                                                                                                            | 1.00 (ref) | 1.02 (0.25-4.06)  | 1.00 (ref) | 1.55 (0.78-3.08) | 1.00 (ref) | 0.84 (0.23-3.14) |
| Adjusted HR (95% CI)                                                                                                              | 1.00 (ref) | 1.03 (0.26-4.13)  | 1.00 (ref) | 1.56 (0.78-3.10) | 1.00 (ref) | 0.80 (0.21-3.00) |
| 90 days                                                                                                                           |            |                   |            |                  |            |                  |
| Unadjusted HR (95% CI)                                                                                                            | 1.00 (ref) | 1.02 (0.06-16.23) | 1.00 (ref) | 1.01 (0.39-2.61) | 1.00 (ref) | 1.01 (0.14-7.15) |
| Adjusted HR (95% CI)                                                                                                              | 1.00 (ref) | 1.04 (0.07-16.67) | 1.00 (ref) | 1.00 (0.38-2.60) | 1.00 (ref) | 0.99 (0.14-7.03) |
| 120 days                                                                                                                          |            |                   |            |                  |            |                  |
| Unadjusted HR (95% CI)                                                                                                            | 1.00 (ref) | 1.00 (0.06-16.06) | 1.00 (ref) | 0.92 (0.32-2.66) | 1.00 (ref) | 0.00 (0-Inf)     |
| Adjusted HR (95% CI)                                                                                                              | 1.00 (ref) | 1.04 (0.06-16.59) | 1.00 (ref) | 0.91 (0.31-2.63) | 1.00 (ref) | 0.00 (0-Inf)     |
| 180 days                                                                                                                          |            |                   |            |                  |            |                  |
| Unadjusted HR (95% CI)                                                                                                            | NA         | NA                | 1.00 (ref) | 0.19 (0.02-1.54) | NA         | NA               |
| Adjusted HR (95% CI)                                                                                                              | NA         | NA                | 1.00 (ref) | 0.19 (0.02-1.53) | NA         | NA               |
| H2RA, histamine-2 receptor antagonist; PPI, proton pump inhibitor; HR, hazard ratio; CI, confidence interval, NA; non-applicable. |            |                   |            |                  |            |                  |

**Table S9.** Hazard ratios of gastric cancer development by comorbidities among the included subjects.

| CCI                            | 0                 |                   | 1                 |                  | ≥2                |                  |
|--------------------------------|-------------------|-------------------|-------------------|------------------|-------------------|------------------|
|                                | H <sub>2</sub> RA | PPI               | H <sub>2</sub> RA | PPI              | H <sub>2</sub> RA | PPI              |
| <b>(For more than) 60 days</b> |                   |                   |                   |                  |                   |                  |
| Unadjusted HR (95% CI)         | 1.00 (ref)        | 1.74 (0.76-3.99)  | 1.00 (ref)        | 1.03 (0.38-2.73) | 1.00 (ref)        | 1.06 (0.32-3.53) |
| Adjusted HR (95% CI)           | 1.00 (ref)        | 1.75 (0.76-4.03)  | 1.00 (ref)        | 1.02 (0.38-2.72) | 1.00 (ref)        | 1.08 (0.32-3.63) |
| <b>90 days</b>                 |                   |                   |                   |                  |                   |                  |
| Unadjusted HR (95% CI)         | 1.00 (ref)        | 1.74 (0.48-6.29)  | 1.00 (ref)        | 0.66 (0.16-2.76) | 1.00 (ref)        | 0.69 (0.12-3.99) |
| Adjusted HR (95% CI)           | 1.00 (ref)        | 1.66 (0.46-5.98)  | 1.00 (ref)        | 0.65 (0.15-2.73) | 1.00 (ref)        | 0.66 (0.11-3.86) |
| <b>120 days</b>                |                   |                   |                   |                  |                   |                  |
| Unadjusted HR (95% CI)         | 1.00 (ref)        | 2.07 (0.38-11.32) | 1.00 (ref)        | 0.29 (0.03-2.63) | 1.00 (ref)        | 0.69 (0.13-3.70) |
| Adjusted HR (95% CI)           | 1.00 (ref)        | 1.99 (0.36-10.88) | 1.00 (ref)        | 0.29 (0.03-2.61) | 1.00 (ref)        | 0.69 (0.12-3.88) |
| <b>180 days</b>                |                   |                   |                   |                  |                   |                  |
| Unadjusted HR (95% CI)         | 1.00 (ref)        | 0.00 (0-Inf)      | 1.00 (ref)        | 0.47 (0.05-4.56) | 1.00 (ref)        | 0.00 (0-Inf)     |
| Adjusted HR (95% CI)           | 1.00 (ref)        | 0.00 (0-Inf)      | 1.00 (ref)        | 0.40 (0.04-3.92) | 1.00 (ref)        | 0.00 (0-Inf)     |

CCI, Charlson Comorbidity Index; H<sub>2</sub>RA, histamine-2 receptor antagonist; PPI, proton pump inhibitor; HR, hazard ratio; CI, confidence interval.

**Table S10.** Incidence per 1,000 person-years and hazard ratios of gastric cancer development between histamine-2 receptor antagonist and proton pump inhibitor user group according to the duration of medication (index date was the first day of the proton pump inhibitor prescription).

| Study subjects          | N    | Case | Incidence | Unadjusted HR (95% CI) | Adjusted HR (95% CI) | <i>P value</i> |
|-------------------------|------|------|-----------|------------------------|----------------------|----------------|
| (For more than) 60 days |      |      |           |                        |                      |                |
| H <sub>2</sub> RA       | 5006 | 23   | 0.64      | 1.00 (ref)             | 1.00 (ref)           | 0.309          |
| PPI                     | 5006 | 28   | 0.83      | 1.34 (0.77-2.33)       | 1.33 (0.77-2.32)     |                |
| 90 days                 |      |      |           |                        |                      |                |
| H <sub>2</sub> RA       | 2919 | 13   | 0.61      | 1.00 (ref)             | 1.00 (ref)           | 0.958          |
| PPI                     | 2919 | 11   | 0.56      | 0.98 (0.44-2.20)       | 0.98 (0.44-2.20)     |                |
| 120 days                |      |      |           |                        |                      |                |
| H <sub>2</sub> RA       | 1883 | 11   | 0.79      | 1.00 (ref)             | 1.00 (ref)           | 0.701          |
| PPI                     | 1883 | 7    | 0.55      | 0.80 (0.31-2.07)       | 0.83 (0.32-2.17)     |                |
| 180 days                |      |      |           |                        |                      |                |
| H <sub>2</sub> RA       | 1003 | 8    | 1.08      | 1.00 (ref)             | 1.00 (ref)           | 0.061          |
| PPI                     | 1003 | 1    | 0.15      | 0.14 (0.02-1.09)       | 0.14 (0.02-1.09)     |                |

H<sub>2</sub>RA, histamine-2 receptor antagonist; PPI, proton pump inhibitor; HR, hazard ratio; CI, confidence interval.

**Table S11.** Incidence per 1,000 person-years and hazard ratios of gastric cancer development between histamine-2 receptor antagonist and proton pump inhibitor user group according to the duration of medication (index date was the last day of *Helicobacter pylori* eradication).

| Study subjects          | N    | Case | Incidence | Unadjusted HR (95% CI) | Adjusted HR (95% CI) | <i>P value</i> |
|-------------------------|------|------|-----------|------------------------|----------------------|----------------|
| (For more than) 60 days |      |      |           |                        |                      |                |
| H <sub>2</sub> RA       | 5006 | 23   | 0.59      | 1.00 (ref)             | 1.00 (ref)           | 0.184          |
| PPI                     | 5006 | 28   | 0.82      | 1.46 (0.83-2.54)       | 1.46 (0.84-2.55)     |                |
| 90 days                 |      |      |           |                        |                      |                |
| H <sub>2</sub> RA       | 2919 | 13   | 0.56      | 1.00 (ref)             | 1.00 (ref)           | 0.851          |
| PPI                     | 2919 | 11   | 0.55      | 1.08 (0.48-2.43)       | 1.08 (0.48-2.44)     |                |
| 120 days                |      |      |           |                        |                      |                |
| H <sub>2</sub> RA       | 1883 | 11   | 0.73      | 1.00 (ref)             | 1.00 (ref)           | 0.825          |
| PPI                     | 1883 | 7    | 0.54      | 0.87 (0.33-2.26)       | 0.90 (0.34-2.36)     |                |
| 180 days                |      |      |           |                        |                      |                |
| H <sub>2</sub> RA       | 1003 | 8    | 1.01      | 1.00 (ref)             | 1.00 (ref)           | 0.069          |
| PPI                     | 1003 | 1    | 0.14      | 0.15 (0.02-1.17)       | 0.14 (0.02-1.16)     |                |

H<sub>2</sub>RA, histamine-2 receptor antagonist; PPI, proton pump inhibitor; HR, hazard ratio; CI, confidence interval.

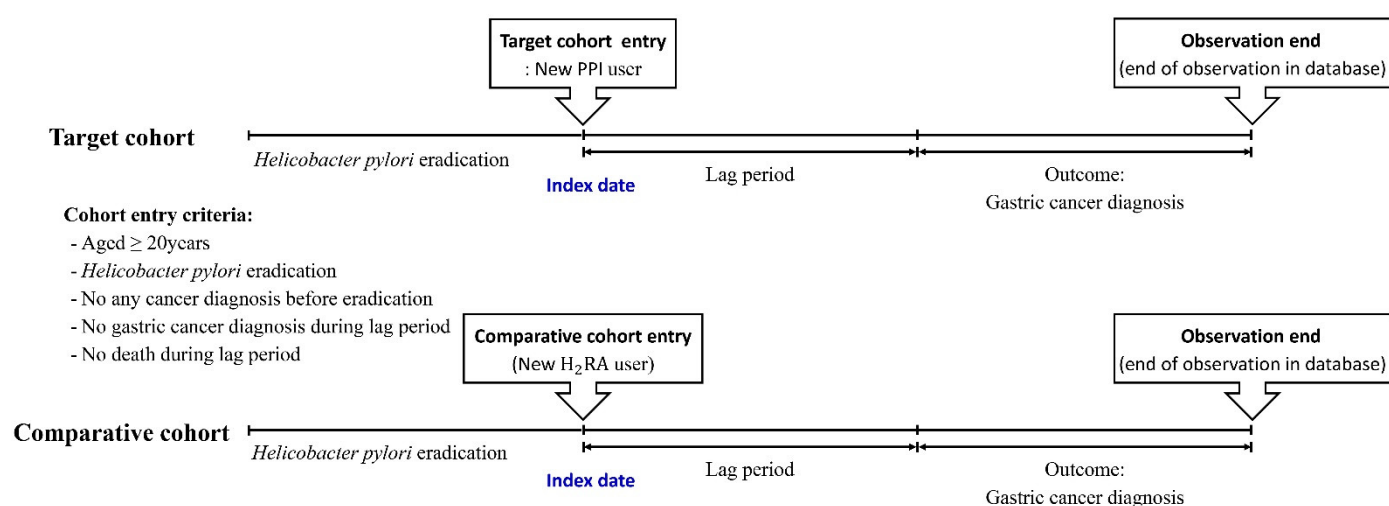

**Figure S1.** Diagram of study cohort construction.

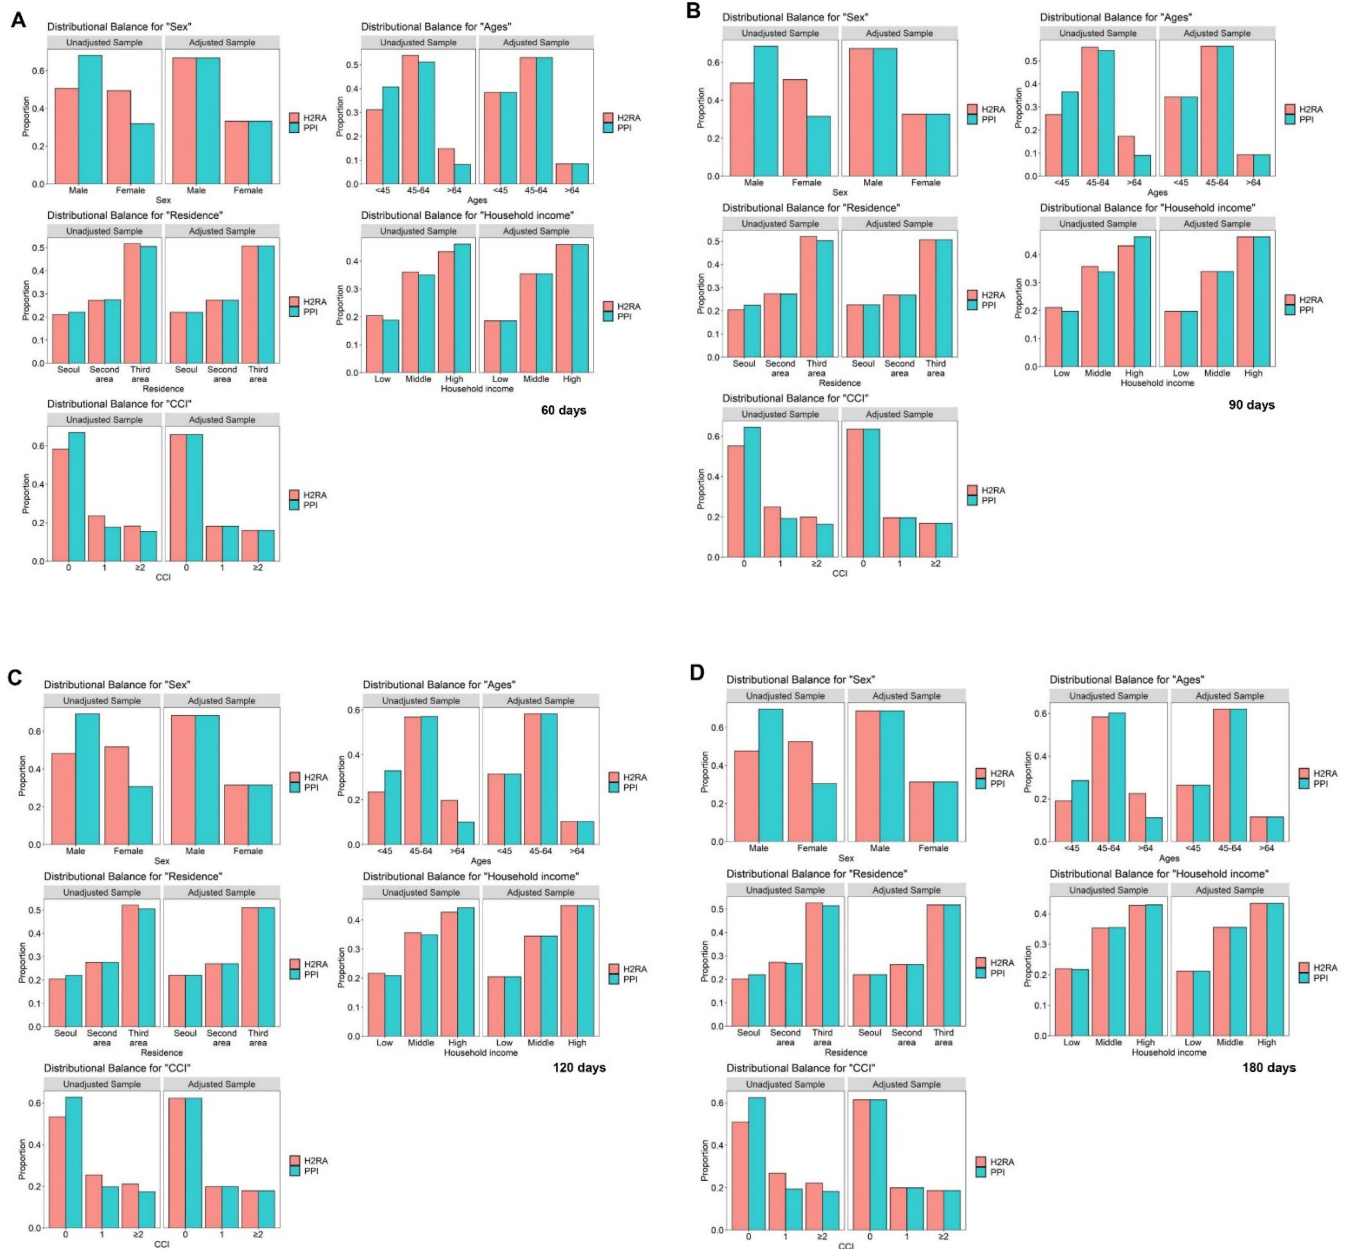

**Figure S2.** Balance plot for 5 variables before and after matching according to each cohort dataset based on the duration of medication. (A) cohort taking medications for more than cumulative daily dose of 60 days, (B) for more than cumulative daily dose of 90 days, (C) for more than cumulative daily dose of 120 days, (D) for more than cumulative daily dose of 180 days. H<sub>2</sub>RA, histamine-2 receptor antagonist; PPI, proton pump inhibitor; CCI, Charlson Comorbidity Index.

## Median follow-up duration

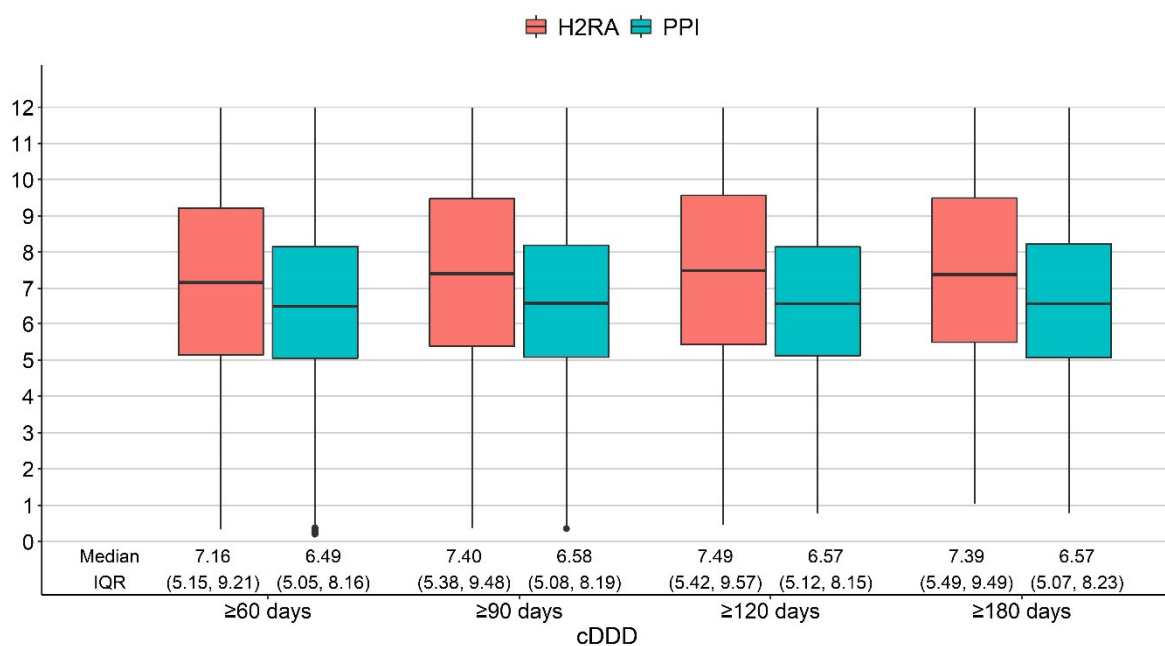

**Figure S3.** Duration of follow-up period according to each cohort dataset based on the duration of medication. The bottom and top edges of the box indicate the interquartile ranges. The lines in the boxes represent the median values. The lines protruding from the box indicate the range of total values. H<sub>2</sub>RA, histamine-2 receptor antagonist; PPI, proton pump inhibitor; cDDD, cumulative drug daily dose.
